# Supplementary material
Source: PubMed Central journal article supplement (PMC1636619)
Supplement: 7601401s8.pdf [file 7601401s8.pdf]

## Supplementary Material and Methods

### Semi-quantitative RT-PCR

Total RNA was isolated from whole eye/antennal imaginal discs dissected from late third instar larvae using the Trizol reagent (Invitrogen, Inc). In case of the *ras*<sup>VI2</sup>, *scrib*<sup>-/-</sup> genotype, in which eye/antennal discs fuse with the brain, the tissue of brain optic lobes was avoided. Equal amounts of RNA were used for first strand synthesis with the Superscript II reverse transcriptase and oligo (dT)<sub>12-18</sub> primers (Invitrogen, Inc). Samples were subjected to PCR analysis (29 cycles) using the following sets of forward and reverse primers, respectively: *mmp1*, 5'-CAGCAGTGGGCTACACGACC-3' and 5'-AGATGGAGTCGTCTAGTGGC-3'; *mmp2*, 5'-TGCAGACCGCCCTGGACGT-3' and 5'-CGCCAACGCTCCTCTTCCTG-3'; *timp*, 5'-ACTACGTTGTGCAACTGCGAG-3' and 5'-GCTCATGCACTTTCTGTAGAG-3'; *gfp*, 5'-ACTGGAGTGGTCCCAGTTCTTGTT-3' and 5'-GCCATTCTTTGGTTTGTCTCCCATG-3'; *rp49*, 5'-TCCTACCAGCTTCAAGATGAC-3' and 5'-CACGTTGTGCACCAGGAACT-3'; *fos*, 5'-GTCAAAGTGGAGCGCACAAACGAAA-3' and 5'-TAGCACCTTTGGCACTGCAAATCC-3'. All PCR analyses were repeated twice with two independent RNA preparations.
